## CORRECTION

# Correction: High Caveolin-1 mRNA expression in triple-negative breast cancer is associated with an aggressive tumor microenvironment, chemoresistance, and poor clinical outcome

Christopher Godina, Somayeh Khazaei, Mattias Belting, Johan Vallon-Christersson, Björn Nodin, Karin Jirström, Karolin Isaksson, Ana Bosch, Helena Jernström

The [S4](#) and [S5 Figs](#) are missing in [S1 File](#). Please see the correct [S1 File](#) here.

## Supporting Information

**S1 File. Supplementary dataset.** This file includes supplementary data. (PDF)

## Reference

1. Godina C, Khazaei S, Belting M, Vallon-Christersson J, Nodin B, Jirström K, et al. High Caveolin-1 mRNA expression in triple-negative breast cancer is associated with an aggressive tumor microenvironment, chemoresistance, and poor clinical outcome. PLoS One. 2024;19(7): e0305222. <https://doi.org/10.1371/journal.pone.0305222> PMID: [38959243](https://pubmed.ncbi.nlm.nih.gov/38959243/)

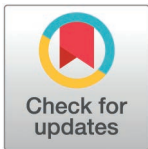

## OPEN ACCESS

**Citation:** Godina C, Khazaei S, Belting M, Vallon-Christersson J, Nodin B, Jirström K, et al. (2025) Correction: High Caveolin-1 mRNA expression in triple-negative breast cancer is associated with an aggressive tumor microenvironment, chemoresistance, and poor clinical outcome. PLoS ONE 20(4): e0322403. <https://doi.org/10.1371/journal.pone.0322403>

**Published:** April 8, 2025

**Copyright:** © 2025 Godina et al. This is an open access article distributed under the terms of the [Creative Commons Attribution License](https://creativecommons.org/licenses/by/4.0/), which permits unrestricted use, distribution, and reproduction in any medium, provided the original author and source are credited.
